# Supplementary material
Source: publisher figshare collection journal article supplement (https://acs.figshare.com/ndownloader/files/3774040)
Supplement: Supplementary file 1 [file 3774040]

Supplemental Material:

## A model for specific and nonspecific binding of ligand to multi-protein complexes by native mass spectrometry

Shenheng Guan<sup>a,b,1</sup>, Michael J. Trnka<sup>a</sup>, David A. Bushnell<sup>c</sup>, Philip J. J. Robinson<sup>c</sup>, Jason E. Gestwicki<sup>a,b</sup>, and Alma L. Burlingame<sup>a</sup>

<sup>a</sup> Department of Pharmaceutical Chemistry and Mass Spectrometry Facility, University of California, San Francisco, California 94158-2517, United States

<sup>b</sup> Institute for Neurodegenerative Diseases and <sup>d</sup> Department of Neurology, University of California, San Francisco, California 94143-0518, United States

<sup>c</sup> Department of Structural Biology, Stanford University School of Medicine, Stanford, CA 94305

<sup>1</sup> To whom correspondence should be addressed. E-mail: [sguan@cgl.ucsf.edu](mailto:sguan@cgl.ucsf.edu)

## Table of Contents

- a. Processing of  $\alpha$ -amanitin/Pol II binding with two specific sites
  - a.1 masses of  $\alpha$ -amanitin/Pol II complexes
  - a.2 Processing of  $\alpha$ -amanitin/Pol II binding with two specific sites
  - a.3 Deconvolution with an exponential function for nonspecific binding
- b. Processing of Shimon Data1
  - b.1 Extraction of apparent associate constants ( $K_s$ ) between ADP and CK
  - b.2 Deconvolution with 2 specific binding consts and constant nonspecific binding
  - b.3 Deconvolution with 2 specific binding consts and inverse power nonspecific binding
- c. FKBP12/Rapamycin complexes
  - c.1 FKBP12 sequence
  - c.2 m/z values of FKBP12/Rapamycin complexes
  - c.3 figures for processing KBP12/Rapamycin binding constant
- d. Description of codes

# Section a

## a.1 masses of $\alpha$ -amanitin/Pol II complexes

|          | # of alpha-amanitin | 0      | 1      | 2      | 3      | 4      | 5      | 6      | 7      | 8      |
|----------|---------------------|--------|--------|--------|--------|--------|--------|--------|--------|--------|
|          | Theoretical mass    | 469682 | 470601 | 471520 | 472439 | 473358 | 474277 | 475196 | 476115 | 477034 |
| 1uM Man  | Measured mass       | 470100 | 471080 |        |        |        |        |        |        |        |
| 5uM Man  | Measured mass       | 470220 | 471100 |        |        |        |        |        |        |        |
| 10uM Man | Measured mass       | 470120 | 471100 | 472140 | 473160 |        |        |        |        |        |
| 20uM Man | Measured mass       | 470320 | 471080 | 472080 | 473060 | 474060 | 475020 | 475920 |        |        |
| 50uM Man | Measured mass       | 470001 | 471020 | 471920 | 472880 | 473800 | 474780 | 475720 | 476640 | 477600 |

Table Sa1. Theoretical and measured masses for  $\alpha$ -amanitin/Pol II 10mer complexes.

|          | # of alpha-amanitin | 0      | 1      | 2      | 3      | 4      | 5      | 6      | 7      | 8      |
|----------|---------------------|--------|--------|--------|--------|--------|--------|--------|--------|--------|
|          | Theoretical mass    | 514154 | 515073 | 515992 | 516911 | 517830 | 518749 | 519668 | 520587 | 521506 |
| 1uM Man  | Measured mass       | 514780 | 515880 |        |        |        |        |        |        |        |
| 5uM Man  | Measured mass       | 514780 | 515760 |        |        |        |        |        |        |        |
| 10uM Man | Measured mass       | 514820 | 515780 | 516760 | 517799 |        |        |        |        |        |
| 20uM Man | Measured mass       | 514279 | 515700 | 516680 | 517660 | 518620 | 519580 | 520720 |        |        |
| 50uM Man | Measured mass       | 514140 | 515560 | 516540 | 517460 | 518380 | 519360 | 520300 | 521300 | 522239 |

Table Sa2. Theoretical and measured masses for  $\alpha$ -amanitin/Pol II 12mer complexes.

The measured masses were obtained by deconvolution of charge states. To avoid overlapping peaks the following charge states were used: 10mer: 50-53; 12mer 47-50.

## a.2 Processing of $\alpha$ -amanitin/Pol II binding with two specific sites

The binding model is

$$Kap_1 = Ks1 + Kn_1 = Ks1 + \beta$$

$$Kap_2 = Ks2 + Kn_2 = Ks2 + \beta/2$$

$$Kap_j = Kn_j = \frac{\beta}{j^\gamma}, j=3, \dots, N$$

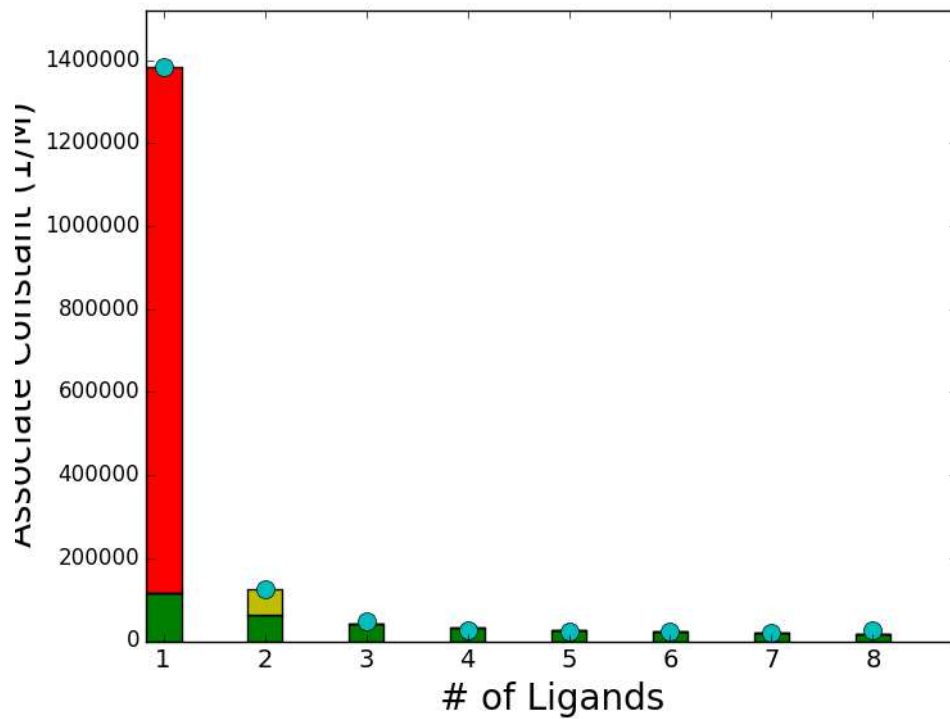

Figure Sb1. Deconvolution of specific binding from nonspecific exponential association constants. Blue circles: apparent association constants; Green bars: contributions of nonspecific binding; Red bar: the first specific binding component (Ks1); Yellow bar: the second specific binding component (Ks2).

$$Ks1 = 1267405.0111 \text{ (0.79 } \mu\text{M)}$$

$$Ks2 = 63398.9060156 \text{ (15.8 } \mu\text{M)}$$

$$\beta = 115004.378632 \text{ (8.7 } \mu\text{M)}$$

$$\gamma = -0.895174261954$$

### a.3 Deconvolution with an exponential function for nonspecific binding

The functional form is

$$Kn_j = \beta e^{-\gamma j}$$

The deconvolution results are  $K_s = 1.2 \times 10^6 M$ ,  $\beta = 4.0 \times 10^5 M$  and  $\gamma = 0.62$

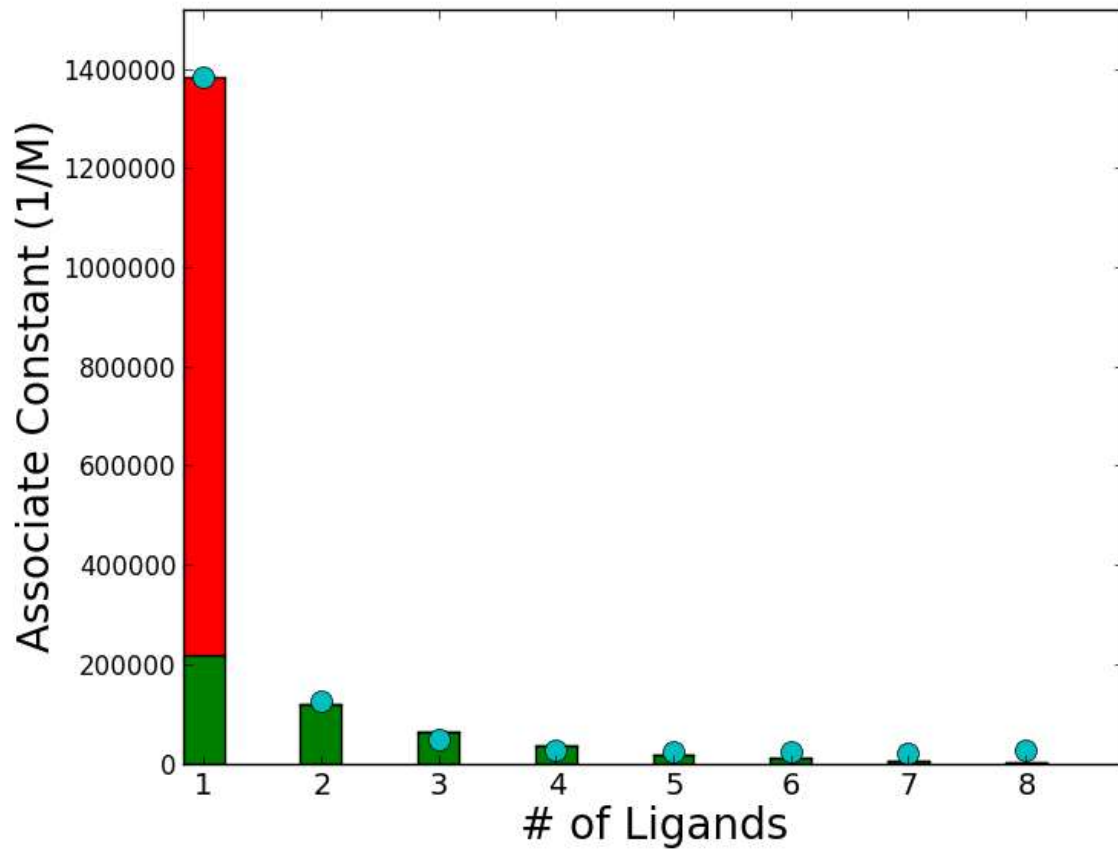

Figure Sd1. Deconvolution of specific binding from nonspecific exponential association constants. Blue circles: apparent association constants; Green bars: contributions of nonspecific binding; Red bar: specific binding component.

## Section b

### b.1 Extraction of appearent associate constants (Kas).

Intensity data from the supplemental material of (Shimon, L.; Sharon, M.; Horovitz, A., A method for removing effects of nonspecific binding on the distribution of binding stoichiometries: application to mass spectroscopy data. Biophys J 2010, 99 (5), 1645-9.) is (a) from charge satate 19 and (b) normalized within a spectrum (at the certain concentration). The signals of the charge state 19 consist of majority of the all signal intensities. Intensities from all charge states can be aggregated together. The results are essentially the same. The input data for the data model is shown in the following table

| # of ADP | 0        | 1           | 2        | 3        | 4        | 5        |
|----------|----------|-------------|----------|----------|----------|----------|
| 5.0E-06  | 0.783609 | 0.216391198 | 0        | 0        | 0        | 0        |
| 1.0E-05  | 0.538314 | 0.366569845 | 0.095116 | 0        | 0        | 0        |
| 1.5E-05  | 0.500266 | 0.409456555 | 0.090277 | 0        | 0        | 0        |
| 2.0E-05  | 0.36327  | 0.45620863  | 0.161786 | 0.018736 | 0        | 0        |
| 3.0E-05  | 0.209488 | 0.428831067 | 0.27487  | 0.070328 | 0.016483 | 0        |
| 4.0E-05  | 0.146669 | 0.329642607 | 0.301703 | 0.156927 | 0.065058 | 0        |
| 5.0E-05  | 0.040476 | 0.238603971 | 0.380873 | 0.223052 | 0.087106 | 0.029889 |
| 1.0E-04  | 0.014055 | 0.16539788  | 0.36554  | 0.275353 | 0.134499 | 0.045155 |

Table Sb1. Refromated raw data from supplemental material of Shimon et al.

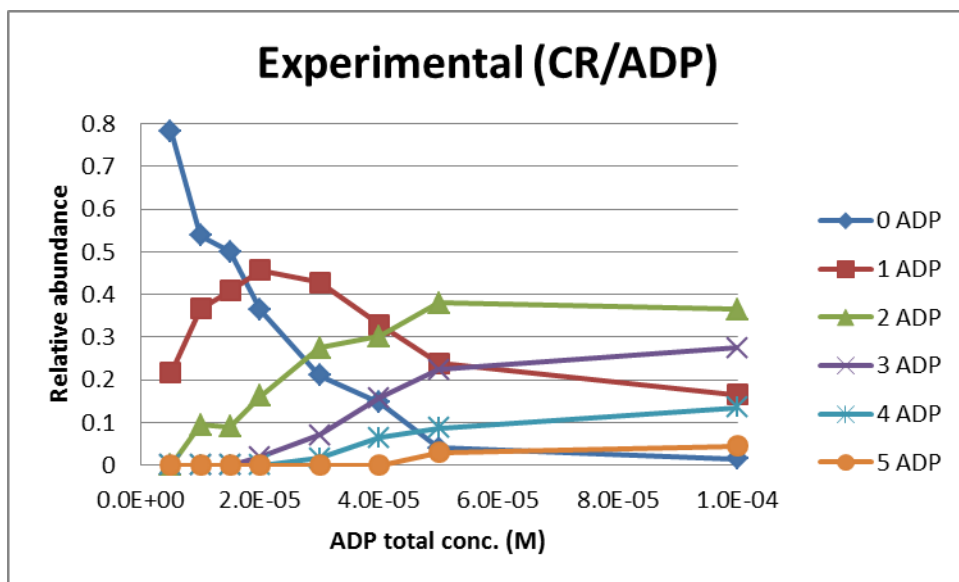

Figure Sb1. Data of Table Sb1

The first level of processing for apparent association constants gives the following results

First the fitted total concentration of the Creatine kinase (CK) is  $4.72\mu\text{M}$  with is 18% higher in value than  $4\mu\text{M}$  reported in the paper. Second, the values of the five binding constants are shown below

|                               |                   |                   |                   |                   |                   |
|-------------------------------|-------------------|-------------------|-------------------|-------------------|-------------------|
| ADP binding                   | $0 \rightarrow 1$ | $1 \rightarrow 2$ | $2 \rightarrow 3$ | $3 \rightarrow 4$ | $4 \rightarrow 5$ |
| $K_a \text{ (M}^{-1}\text{)}$ | 77359             | 28551             | 11322             | 5722              | 3591              |
| $K_d \text{ (M)}$             | 1.29E-05          | 3.50E-05          | 8.83E-05          | 1.73E-4           | 2.79E-4           |

Table Sb2. Apparent binding constants of ADP to Creatine kinase (CK)

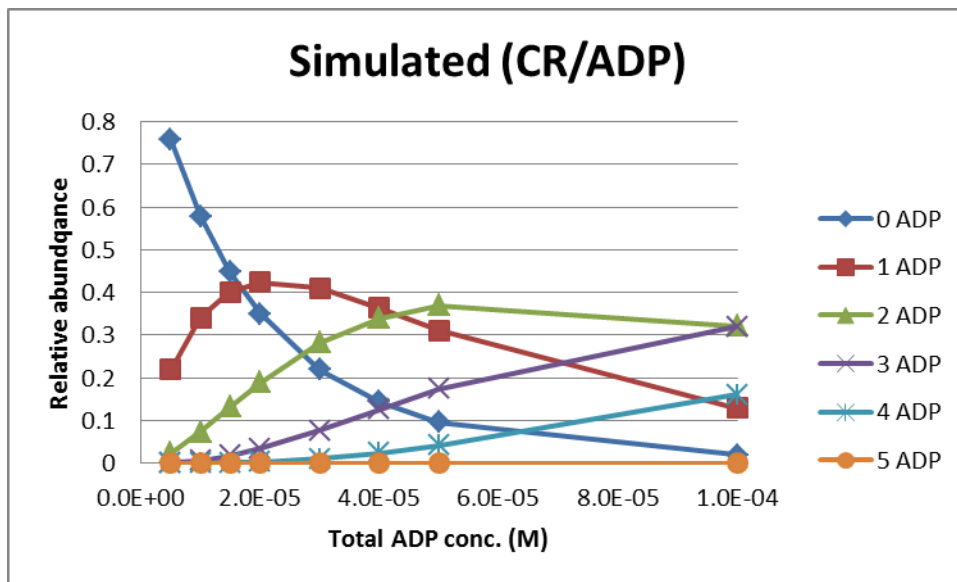

Figure Sb2. Simulated relative abundances of CK/ADP complexes using apparent binding constants of Table Sb2 and fitted conc of CK of 4.7 $\mu$ M

## b.2 Deconvolution of specific binding (2 independent sites) from nonspecific binding (constant)

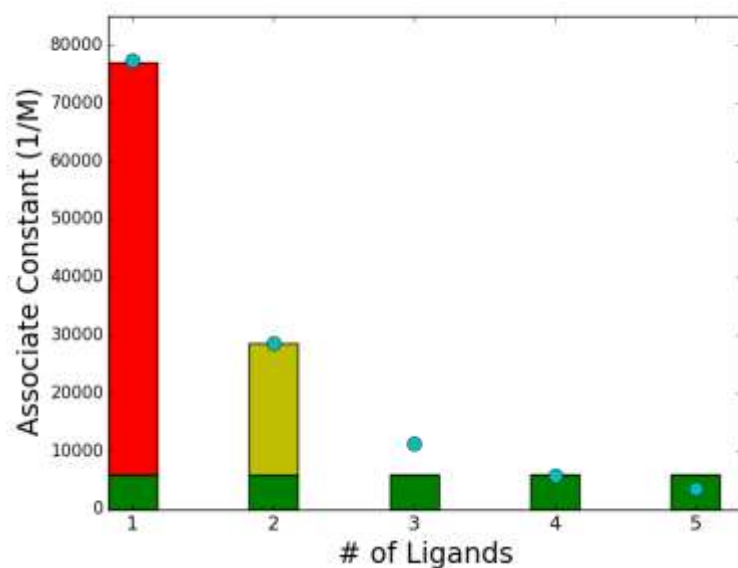

Figure Sb2. Deconvolution of specific binding from nonspecific exponential association constants. Blue circles: apparent association constants; Green bars: contributions of nonspecific (constant model) binding; Red bar: the first specific binding component (Ks1); Yellow bar: the second specific binding component (Ks2).

$$K_{s0} = 71208.3610783 \text{ M}^{-1} (14.0 \text{ } \mu\text{M})$$

$$K_{s1} = 22633.4317309 \text{ M}^{-1} (44.2 \text{ } \mu\text{M})$$

$$\text{beta} = 5917.1873316 \text{ M}^{-1} (169 \text{ } \mu\text{M})$$

$$\text{gamma} = 0.0$$

### b.3 Deconvolution of specific binding (2 independent sites) from nonspecific binding (inverse power law)

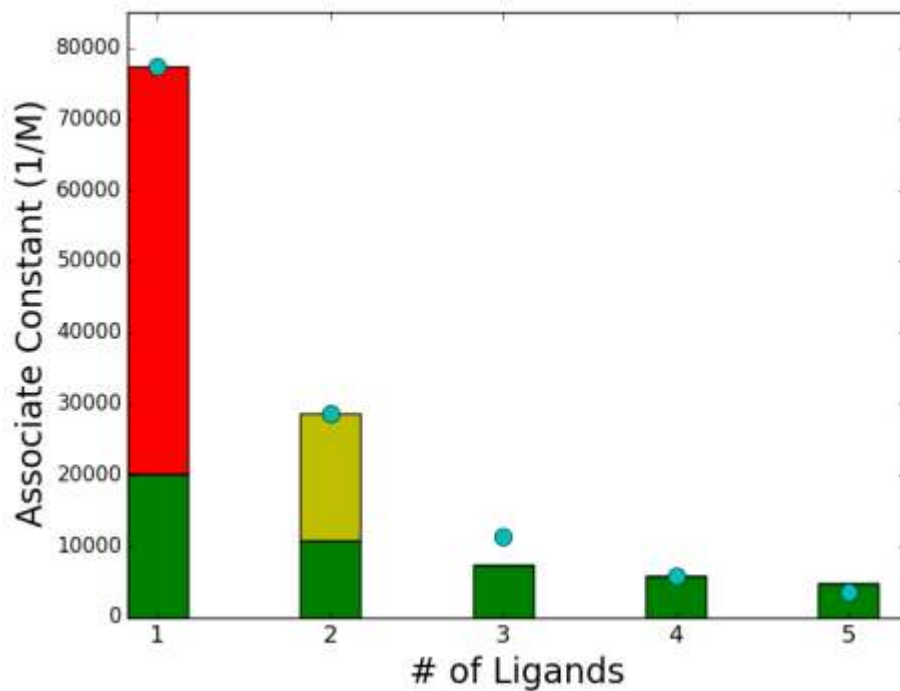

Figure Sb3. Deconvolution of specific binding from nonspecific exponential association constants. Blue circles: apparent association constants; Green bars: contributions of nonspecific (power inverse model) binding; Red bar: the first specific binding component (Ks1); Yellow bar: the second specific binding component (Ks2).

$K_{s1} = 57246.7272953$  (17.5  $\mu\text{M}$ )

$K_{s2} = 17823.01081$  (56.1  $\mu\text{M}$ )

$\beta = 20111.9720832$  (49.7  $\mu\text{M}$ )

$\gamma = 0.907$

# Section c

## c.1 FKBP12 sequence

MHHHHHHSSGVDLG TENLYFQSNAMGVQVETISPGDGRTFPKRGQTCVVHYTG MLED  
GKKFDSSRD RNKPFK FMLGKQE VIRGWEEGVAQMSVGQRAKLTISPDYAYGATGH PGII  
PPHATLVFDVELLKLE

## c.2 m/z values of FKBP12/Rapamycin complexes

| Species         | <i>FKBP12</i>           |         |         | <i>FKBP12+Ni</i>           |         |         |
|-----------------|-------------------------|---------|---------|----------------------------|---------|---------|
| charge state    | 8+                      | 7+      | 6+      | 8+                         | 7+      | 6+      |
| Theoretical m/z | 1835.95                 | 2098.23 | 2447.93 | 1843.29                    | 2106.61 | 2457.71 |
| measured m/z    | 1836.9                  | 2099.3  | 2448.9  | 1844.1                     | 2107.5  | 2458.4  |
|                 |                         |         |         |                            |         |         |
| Species         | <i>FKBP12+Rapamycin</i> |         |         | <i>FKBP12+Ni+Rapamycin</i> |         |         |
| charge state    | 8+                      | 7+      | 6+      | 8+                         | 7+      | 6+      |
| Theoretical m/z | 1950.22                 | 2228.82 | 2600.29 | 1957.56                    | 2237.21 | 2610.08 |
| measured m/z    | 1951.2                  | 2229.8  | 2601.3  | 1958.3                     | 2238.0  | 2610.8  |

Table Sc1. Measured m/z values of charge states of all FKBP12, FKBP12+Ni, FKBP12+Rapamycin, FKBP12+Ni+Rapamycin species.

c.3 figures for processing FKBP12/Rapamycin binding constant

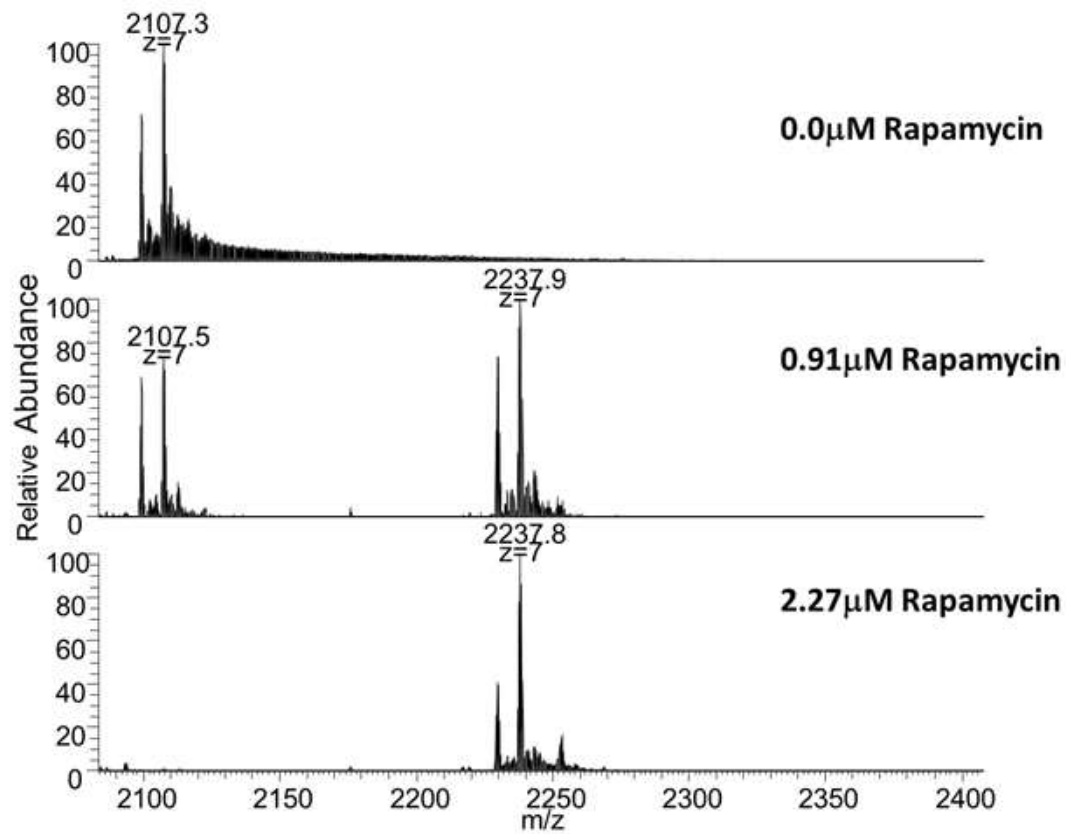

Figure Sc1. Native mass spectra of FKBP12 and Rapamycin. FKBP12 contains a His-tag and both ions with and without Ni atom were observed. Nonspecific binding products for the charge state of 7 were not observed.

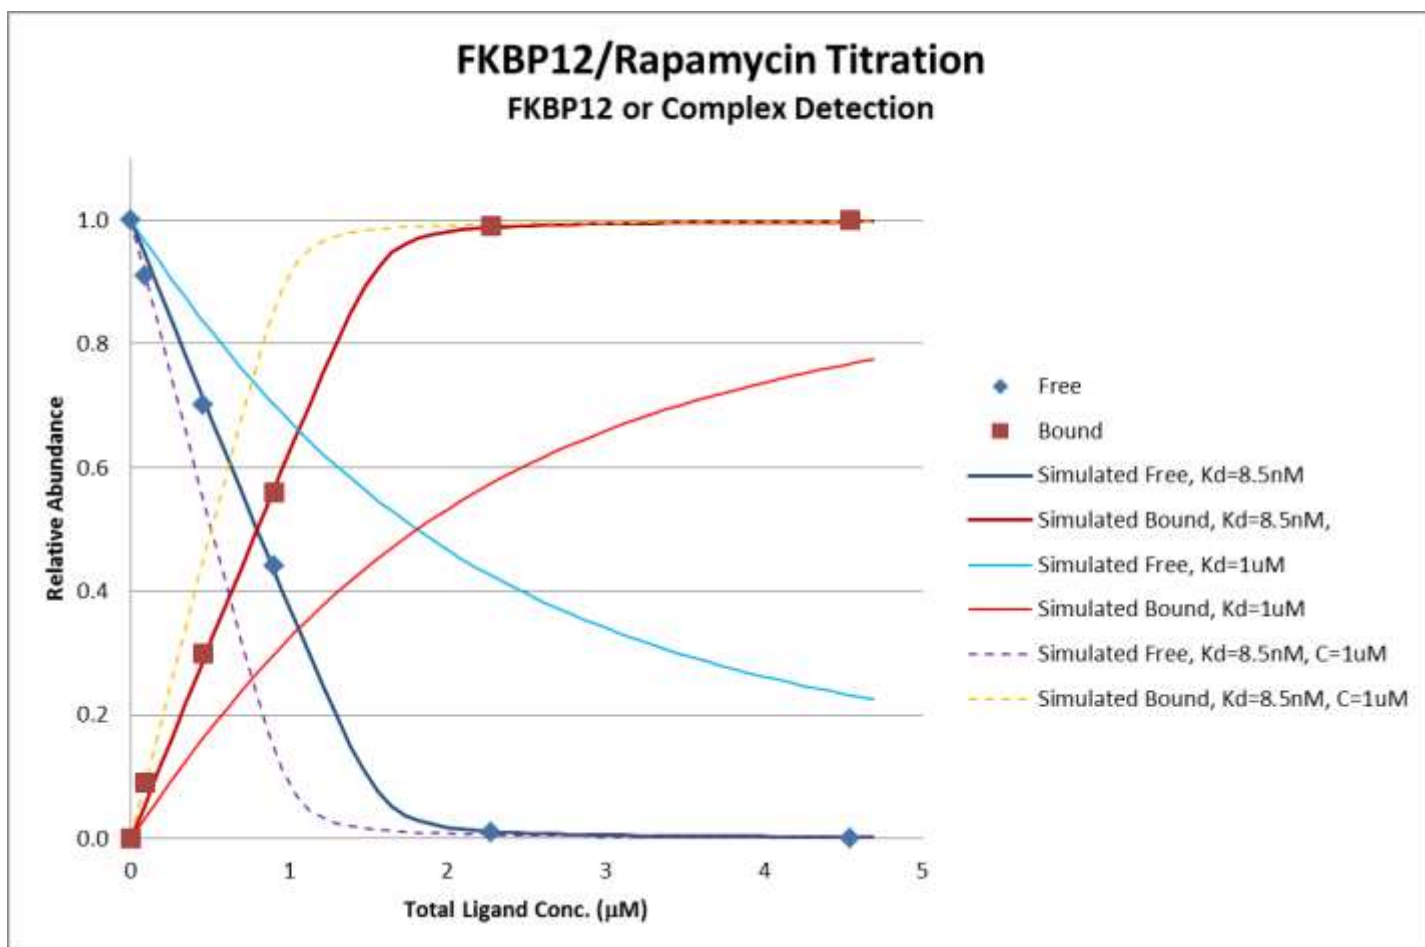

Figure Sc2. Titration curves of FKBP12 against rapamycin with FKBP12 or complex signals. Intensities of FKBP12/rapamycin complexes for all charge states 6, 7, and 8 were aggregated for the relative abundances. Thick solid curves are from simulation with  $K_d = 8.5 \text{ nM}$  and FKBP12 conc of  $1.58 \mu\text{M}$  (obtained by fitting the experimental data (dots)). Thin curves are from simulation with frictional  $K_d = 1 \mu\text{M}$  and FKBP12 conc of  $1.58 \mu\text{M}$ . Dashed lines are from  $K_d = 8.5 \text{ nM}$  and FKBP12 conc of  $1.0 \mu\text{M}$ .

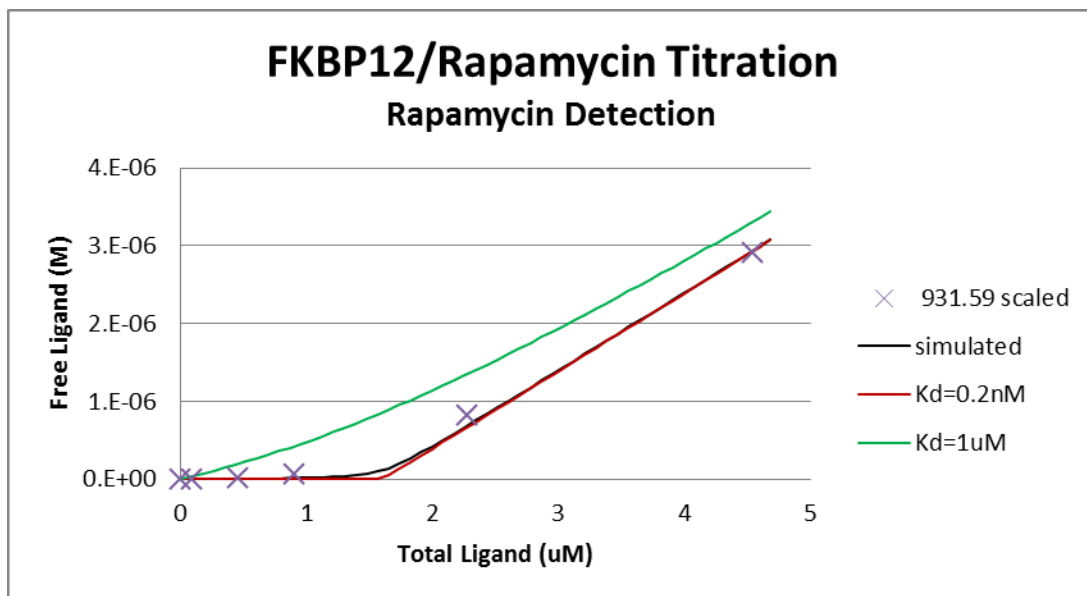

Figure Sc3. Free rapamycin (at m/z 936.6) during titration of Rapamycin against FKBP12. The vertical axis has been scaled according to Rapamycin target free concentration/signal intensity ratios. The simulated curves are: Black: using  $K_d=8.5\text{nM}$ ; Red: frictional  $K_d=0.2\text{nM}$ ; and Green: frictional  $K_d$  of  $1\mu\text{M}$ . All curves were using FKBP12 conc of  $1.58\mu\text{M}$ .

# Section d

## d.1 Description of sample data and codes:

fsolve\_withPT.py computes for apparent associate binding constants from relative intensities of native MS spectra from a series of titration samples.

fsolve\_withPT.py takes two command line arguments: input file name of “MamPol2\_titration\_data.txt” and output file name of “Kaps\_result.txt”

deconvKas\_general\_curveFit.py deconvolutes specific from nonspecific binding.

deconvKas\_general\_curveFit.py takes two command line arguments: input file name of “Kaps\_result.txt” and a number of 0, 1, or 2. 0 is for the constant nonspecific binding, 1 is for the inverse power function, and 2 is for exponential function

The codes and data files were included in the CodeAndData.zip file
